# Supplementary material for: High SEC61G expression predicts poor prognosis in patients with Head and Neck Squamous Cell Carcinomas
Source: PubMed Central journal article supplement (PMC8176234; doi:10.7150/jca.51467), 2021-05-05
Supplement: jcav12p3887s1.pdf [file jcav12p3887s1.pdf]

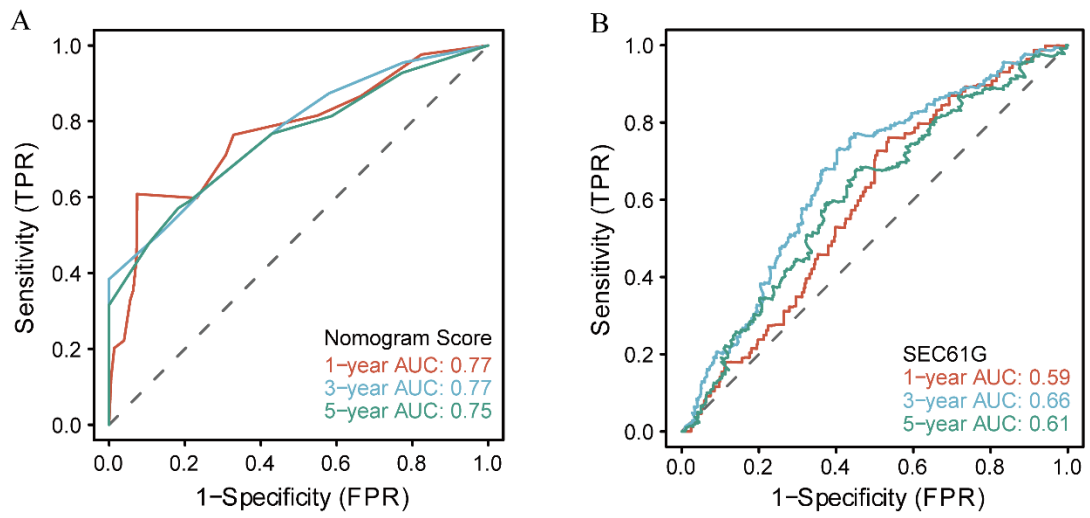

**Figure S1. Time-dependent ROC analysis.** Time-dependent ROCs for predicting the probability of 1-, 3-, and 5-year OS for HNSCC patients based on nomogram score (A) and SEC61G expression (B).

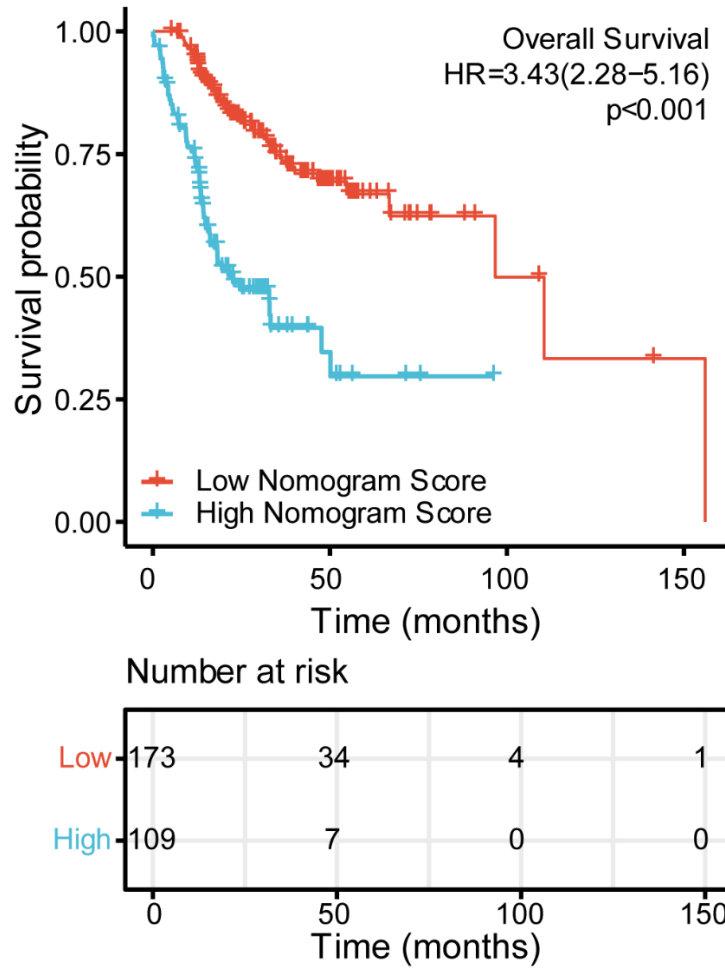

**Figure S2. Kaplan–Meier curve for overall survival in HNSCC patients by nomogram score.**
